# Supplementary material
Source: PubMed Central journal article supplement (PMC3798014)
Supplement: NIHMS504567-supplement-supplement_1.pdf [file NIHMS504567-supplement-supplement_1.pdf]

**Supplementary Table 1.** Uncorrected and corrected results of expression analyses. Analyses are shown for three stages for males only and females only to demonstrate the sex differences in expression before and after the thermosensitive period of development. The first of the three stages is not male- or female-specific.

| Gene  | Comparison of Expression Among/Between      | df | EMS         |           | F           |           | P           |           |
|-------|---------------------------------------------|----|-------------|-----------|-------------|-----------|-------------|-----------|
|       |                                             |    | Uncorrected | Corrected | Uncorrected | Corrected | Uncorrected | Corrected |
| LDHA  | Three Stages                                | 2  | 295.194     | N/A       | 22.915      | N/A       | <0.001      | N/A       |
|       | Three Stages (Males Only)                   | 2  | 234.219     | N/A       | 17.053      | N/A       | <0.001      | N/A       |
|       | Three Stages (Females Only)                 | 2  | 178.767     | N/A       | 17.784      | N/A       | <0.001      | N/A       |
| FOXL2 | Three Stages                                | 2  | 275.615     | 1.845     | 82.335      | 2.452     | <0.001      | 0.098     |
|       | Three Stages (Males Only)                   | 2  | 148.658     | 1.535     | 54.997      | 1.981     | <0.001      | 0.156     |
|       | Three Stages (Females Only)                 | 2  | 139.189     | 0.622     | 29.465      | 1.427     | <0.001      | 0.26      |
|       |                                             |    | t           |           |             |           | P           |           |
|       |                                             |    | Uncorrected | Corrected |             |           | Uncorrected | Corrected |
|       | Late Embryo Males & Late Embryo Females     |    | 0.392       | -1.377    |             |           | 0.703       | 0.199     |
|       | Juvenile Males & Juvenile Females           |    | 0.878       | 0.301     |             |           | 0.389       | 0.766     |
|       | Late Embryo Males & Juvenile Males          |    | 12.266      | -1.153    |             |           | <0.001      | 0.263     |
|       | Late Embryo Females & Juvenile Females      |    | 6.934       | -0.97     |             |           | <0.001      | 0.35      |
|       | Early Embryos & Late Embryo Males           |    | -8.311      | 4.69      |             |           | <0.001      | <0.001    |
|       | Early Embryos & Late Embryo Females         |    | -6.968      | 4.587     |             |           | <0.001      | <0.001    |
|       |                                             |    | EMS         |           | F           |           | P           |           |
|       |                                             |    | Uncorrected | Corrected | Uncorrected | Corrected | Uncorrected | Corrected |
|       | Juvenile Male Tissues                       | 5  | 2.414       | 3.227     | 1.319       | 4.086     | 0.338       | 0.033     |
|       | Juvenile Female Tissues                     | 5  | 8.473       | 2.093     | 7.498       | 960.999   | 0.064       | <0.001    |
|       |                                             |    | t           |           |             |           | P           |           |
|       |                                             |    | Uncorrected | Corrected |             |           | Uncorrected | Corrected |
|       | Juvenile Male Lung & Juvenile Female Lung   |    | -0.72       | 0.679     |             |           | 0.504       | 0.523     |
|       | Juvenile Male Brain & Juvenile Female Brain |    | 1.584       | -0.387    |             |           | 0.211       | 0.724     |
|       | Juvenile Testes & Juvenile Ovaries          |    | 16.148      | -3.6      |             |           | 0.039       | 0.172     |
|       |                                             |    | EMS         |           | F           |           | P           |           |
|       |                                             |    | Uncorrected | Corrected | Uncorrected | Corrected | Uncorrected | Corrected |
| FGF9  | Three Stages                                | 2  | 9.173       | 0.33      | 1.504       | 3.866     | 0.231       | 0.027     |
|       | Three Stages (Males Only)                   | 2  | 20.794      | 0.27      | 5.677       | 2.767     | <0.01       | 0.075     |
|       | Three Stages (Females Only)                 | 2  | 2.839       | 0.116     | 0.507       | 3.152     | 0.609       | 0.059     |
|       |                                             |    | t           |           |             |           | P           |           |
|       |                                             |    | Uncorrected | Corrected |             |           | Uncorrected | Corrected |
|       | Late Embryo Males & Late Embryo Females     |    | 0.327       | -0.821    |             |           | 0.751       | 0.433     |
|       | Juvenile Males & Juvenile Females           |    | -2.947      | 0.4       |             |           | <0.01       | 0.692     |
|       | Late Embryo Males & Juvenile Males          |    | 1.749       | -1.36     |             |           | 0.09        | 0.184     |
|       | Late Embryo Females & Juvenile Females      |    | -0.753      | -1.424    |             |           | 0.463       | 0.175     |
|       | Early Embryos & Late Embryo Males           |    | 1.398       | -2.334    |             |           | 0.185       | 0.036     |
|       | Early Embryos & Late Embryo Females         |    | 1.984       | -2.041    |             |           | 0.067       | 0.061     |
|       |                                             |    | EMS         |           | F           |           | P           |           |
|       |                                             |    | Uncorrected | Corrected | Uncorrected | Corrected | Uncorrected | Corrected |
|       | Juvenile Male Tissues                       | 5  | 9.668       | 0.523     | 2.204       | 9.243     | 0.092       | <0.001    |
|       | Juvenile Female Tissues                     | 5  | 65.762      | 0.201     | 818.965     | 2.903     | <0.001      | 0.113     |
|       |                                             |    | t           |           |             |           | P           |           |
|       |                                             |    | Uncorrected | Corrected |             |           | Uncorrected | Corrected |
|       | Juvenile Male Heart & Juvenile Female Heart |    | -2.451      | 0.271     |             |           | 0.04        | 0.794     |
|       | Juvenile Male Brain & Juvenile Female Brain |    | -1.844      | 1.804     |             |           | 0.102       | 0.109     |
